# Supplementary material for: Endovascular Therapy and Outcomes Among Patients With Very Large Ischemic Core Stroke
Source: PubMed Central journal article supplement (PMC11066696; doi:10.1001/jamanetworkopen.2024.9298), 2024-05-02
Supplement: jamanetwopen-e249298-s001.pdf [file jamanetwopen-e249298-s001.pdf]

## Supplemental Online Content

Xie D, Huang J, Fan S, et al. Endovascular therapy and outcomes among patients with very large ischemic core stroke. *JAMA Netw Open*. 2024;7(5):e249298.  
doi:10.1001/jamanetworkopen.2024.9298

**eTable 1.** Baseline Characteristics of Patients After PSM

**eTable 2.** Primary, Secondary, and Safety Outcomes After PSM

**eFigure.** Distribution of Modified Rankin Scale Score at 90 Days After PSM

**eMethods.** Sample Size Calculation

This supplemental material has been provided by the authors to give readers additional information about their work.

eTable 1

| <b>Baseline Characteristic</b>            | All                | SMT<br>(n=70)      | EVT<br>(n=70)      | <i>P</i><br>Value |
|-------------------------------------------|--------------------|--------------------|--------------------|-------------------|
| <b>Age, median (IQR), y</b>               | 70 (64, 78)        | 70 (65, 77)        | 70 (63, 79)        | 0.92              |
| <b>Sex, No (%)</b>                        |                    |                    |                    |                   |
| Female                                    | 70 (50)            | 36 (51.4)          | 34 (48.6)          | 0.74              |
| Male                                      | 70 (50)            | 34 (48.6)          | 36 (51.4)          |                   |
| <b>Medical history No. (%)</b>            |                    |                    |                    |                   |
| Diabetes                                  | 24 (17.1)          | 11 (15.7)          | 13 (18.6)          | 0.65              |
| Hypertension                              | 87 (62.1)          | 43 (61.4)          | 44 (62.9)          | 0.86              |
| Atrial fibrillation                       | 65 (46.4)          | 34 (48.6)          | 31 (44.3)          | 0.61              |
| Hyperlipidemia                            | 22 (15.7)          | 11 (15.7)          | 11 (15.7)          | >0.99             |
| Smoking                                   | 28 (20.0)          | 12 (17.1)          | 16 (22.9)          | 0.40              |
| <b>Clinical characteristics</b>           |                    |                    |                    |                   |
| Systolic BP, mmHg, median (IQR)           | 150 (132, 170)     | 151 (130, 178)     | 150 (137, 170)     | 0.91              |
| Diastolic BP, mmHg, median (IQR)          | 87 (76, 101)       | 86 (78, 100)       | 89.5 (72, 102)     | 0.95              |
| <b>Hemisphere, No. (%)</b>                |                    |                    |                    |                   |
| left                                      | 69 (49.3)          | 34 (48.6)          | 35 (50.0)          | 0.87              |
| right                                     | 71 (50.0)          | 36 (51.0)          | 35 (50.0)          |                   |
| Glucose, mmol/L, median (IQR)             | 7.3 (6.2, 8.6)     | 7.3 (6.0, 8.1)     | 7.5 (6.3, 9.1)     | 0.25              |
| IVT, No. (%)                              | 40 (28.6)          | 21 (30)            | 19 (27.1)          | 0.71              |
| General Anesthesia, No. (%)               | NA                 | NA                 | 12 (17.1)          | NA                |
| Baseline NIHSS score, median (IQR)        | 18 (15, 24)        | 18 (14, 25)        | 18 (16, 23)        | 0.62              |
| <b>Baseline ASPECTS, median (IQR)</b>     |                    |                    |                    |                   |
| 0-1                                       | 98 (70)            | 49 (70)            | 49 (70)            | >0.99             |
| 2                                         | 42 (30)            | 21 (30)            | 21 (30)            |                   |
| <b>Onset to imaging (minutes) (IQR)</b>   | 314 (169.5, 527.8) | 299.5 (175, 503.8) | 364 (147.3, 585.3) | 0.74              |
| <b>Occlusion site No. (%)</b>             |                    |                    |                    |                   |
| Intracranial internal carotid artery      | 70 (50.0)          | 35 (50.0)          | 35 (50.0)          | 0.77              |
| M1 middle cerebral artery segment         | 62 (44.3)          | 32 (45.7)          | 30 (42.9)          |                   |
| M2 middle cerebral artery segment         | 8 (5.7)            | 3 (4.3)            | 5 (7.1)            |                   |
| <b>Stroke causative mechanism No. (%)</b> |                    |                    |                    |                   |
| LAA                                       | 44 (31.4)          | 22 (31.4)          | 22 (31.4)          | 0.86              |

|                                           |           |           |           |    |
|-------------------------------------------|-----------|-----------|-----------|----|
| CE                                        | 80 (57.1) | 41 (58.6) | 39 (55.7) |    |
| Other                                     | 1 (1.4)   | 3 (1.4)   | 3 (1.4)   |    |
| Unknown                                   | 12 (8.6)  | 6 (8.6)   | 6 (8.6)   |    |
| <b>Successful recanalization</b>          | NA        | NA        | 59 (84.2) | NA |
| <b>mTICI <math>\geq</math>2b, No. (%)</b> |           |           |           |    |

eTable 2

| Outcomes                  | SMT<br>(n=70) | EVT<br>(n=70) | <i>P</i> value | Unadjusted OR, <i>P</i>     | Adjusted OR <sup>#</sup> , <i>P</i> |
|---------------------------|---------------|---------------|----------------|-----------------------------|-------------------------------------|
| <b>Primary Outcome</b>    |               |               |                |                             |                                     |
| mRS0-3 (%)                | 6 (8.6)       | 17 (24.3)     | 0.01           | 3.42 (1.26-9.29),<br>0.02   | 5.00 (1.63-15.27),<br>0.005         |
| <b>Secondary Outcomes</b> |               |               |                |                             |                                     |
| mRS0-1 (%)                | 1 (1.4)       | 0 (0)         | 0.32           | NA                          | NA                                  |
| mRS0-2 (%)                | 1 (1.4)       | 9 (12.9)      | 0.009          | 10.18 (1.25-82.68),<br>0.03 | 27.75 (2.5-308.06)<br>0.007         |
| mRS=5 (%)                 | 12(17.1)      | 5 (7.1)       | 0.07           | 0.37 (0.12-1.12),<br>0.08   | 0.32 (0.10-1.00)<br>0.05            |
| <b>Safety Outcomes</b>    |               |               |                |                             |                                     |
| sICH (%)                  | 1 (1.4)       | 7 (10)        | 0.03           | 7.67 (0.92-64.06)<br>0.06   | 8.91 (0.98-81.20)<br>0.05           |
| Any ICH (%)               | 10 (14.3)     | 22 (31.4)     | 0.02           | 2.75 (1.19-6.36),<br>0.02   | 2.94 (1.24-6.94)<br>0.01            |
| Cerebral hernia           | 16 (22.9)     | 33 (47.1)     | 0.003          | 3.01 (1.45-6.24)<br>0.003   | 3.32 (1.51-7.28)<br>0.003           |
| Mortality (%)             | 37 (52.9)     | 41 (58.6)     | 0.50           | 1.26 (0.65-2.46),<br>0.50   | 1.30 (0.62-2.72),<br>0.49           |

<sup>#</sup> Adjusting for age, baseline NIHSS, IVT, onset to imaging, stroke causative mechanism

eFigure

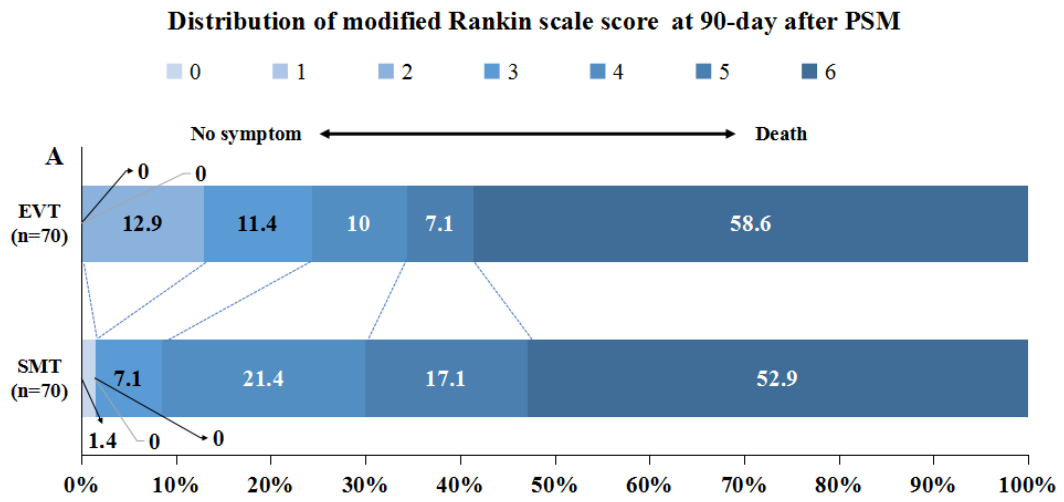

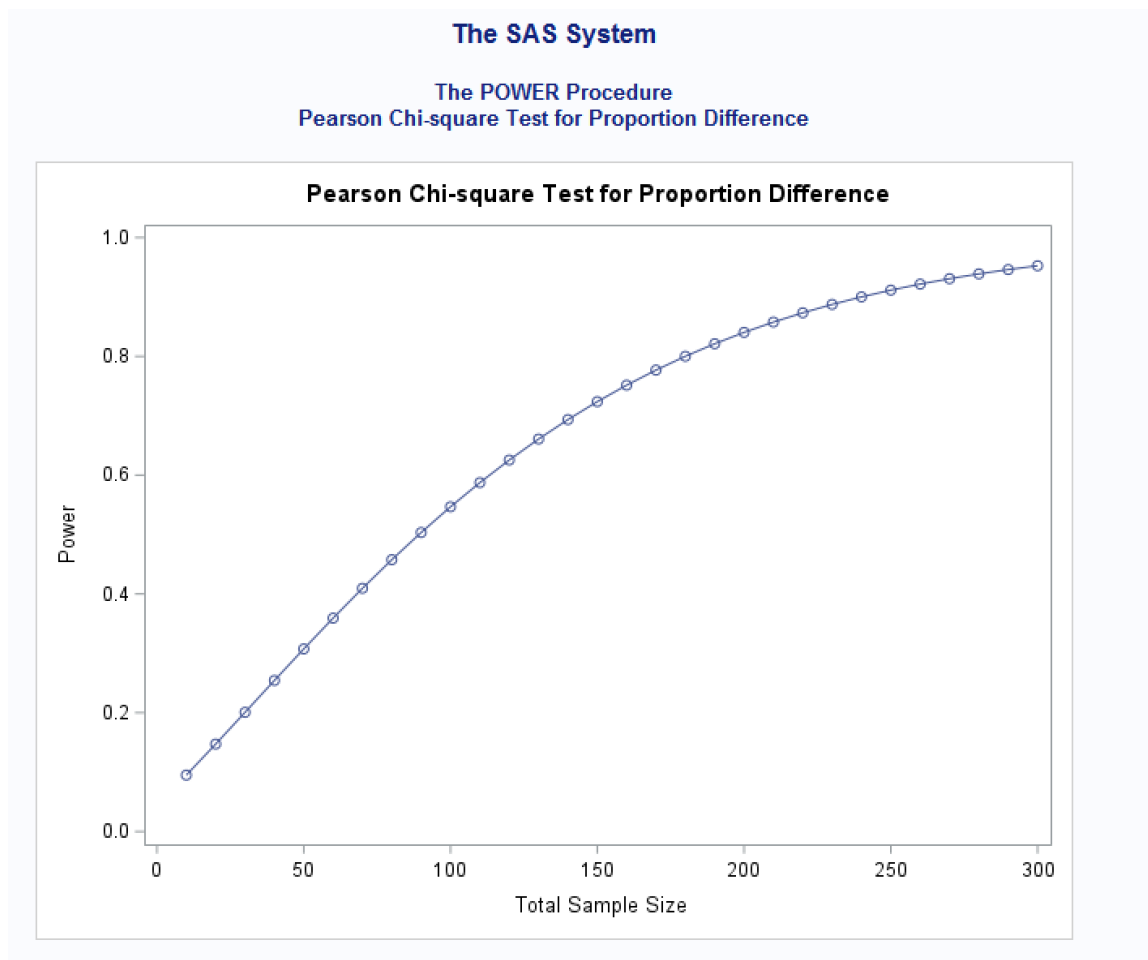

We assume the rate of achieving a favorable outcome for patients with ASPECTS of 0 to 2 was 0.267 in the SMT group, and assuming an 20% treatment effect of EVT. The Figure illustrates how the power of the study changes with different total sample sizes, maintaining a ratio of EVT:SMT = 1:1 and using a two-sided alpha level of 0.05.

Based on these calculations, it was found the current sample size would provide a power greater than 0.904 with a two-sided alpha level of 0.05.

Moreover, the sample size of current study is three-fold than the meta-analysis the subgroup of patients with a baseline ASPECTS of lower than 2 containing 2 randomized trials, and is the largest sample size study which compared the EVT and SMT in patients with extended large core infarction.
