# Supplementary material for: Endovascular Therapy and Outcomes Among Patients With Very Large Ischemic Core Stroke
Source: PubMed Central journal article supplement (PMC11066696; doi:10.1001/jamanetworkopen.2024.9298), 2024-05-02
Supplement: jamanetwopen-e249298-s002.pdf [file jamanetwopen-e249298-s002.pdf]

## Data Sharing Statement

Xie. Endovascular Therapy and Outcomes Among Patients With Very Large Ischemic Core Stroke. *JAMA Netw Open*. Published May 02, 2024. doi:10.1001/jamanetworkopen.2024.9298

### Data

**Data available:** No
